# Supplementary figures and images for: Microscopic basis for pattern formation and anomalous transport in two-dimensional active gels
Source: Royal Society of Chemistry journal article supplement (doi:10.1039/c0sm00888e), 2010-12-14

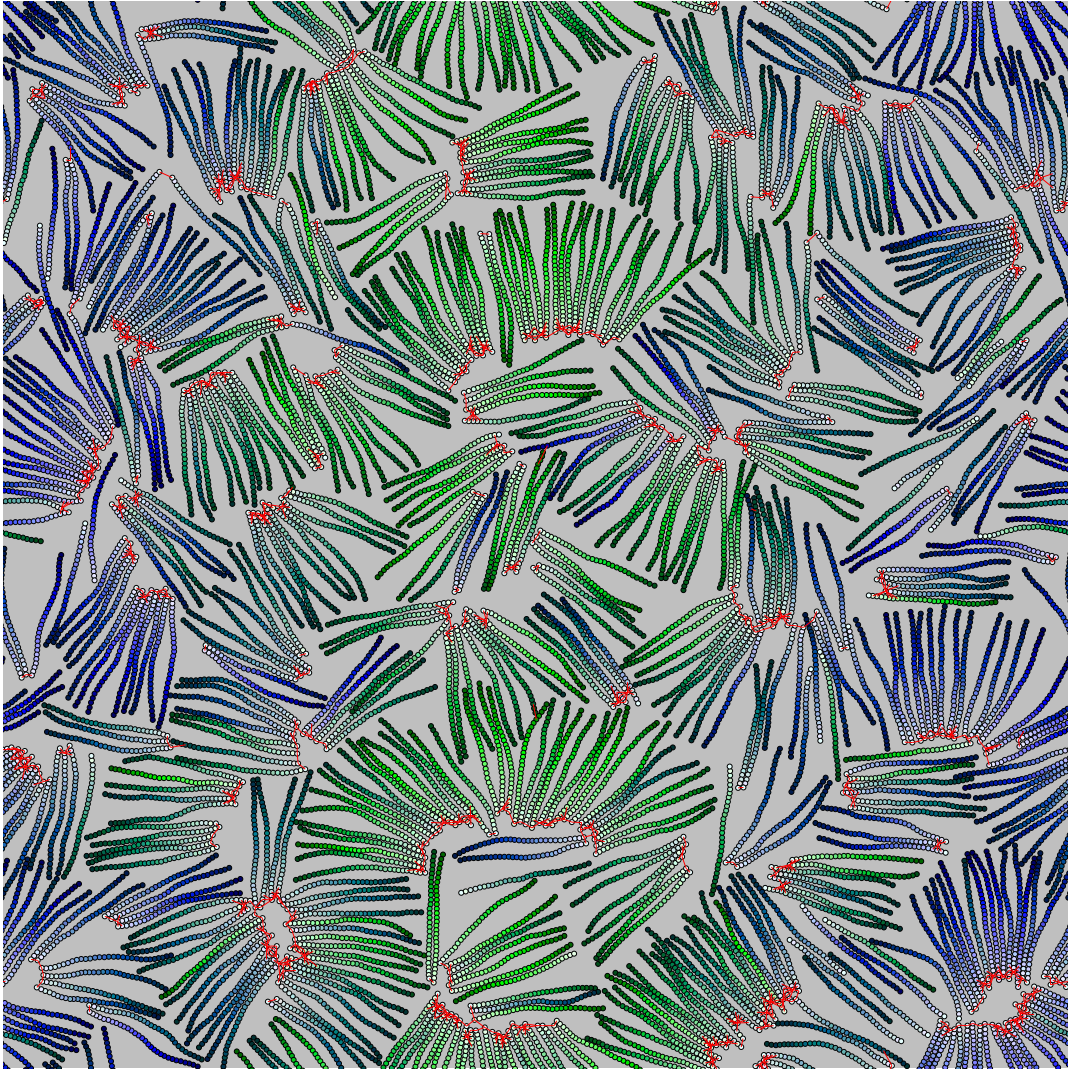

Supplement: snapshot_40_75.pdf [file snapshot_40_75.pdf]
